# Supplementary material for: Content Analysis of Smartphone Apps for Smoking Cessation in China: Empirical Study
Source: PubMed Central journal article supplement (PMC5589410; doi:10.2196/mhealth.7462), 2017-07-11
Supplement: mhealth_v5i7e93_app1.pdf [file mhealth_v5i7e93_app1.pdf]

Multimedia Appendix 1. The adherence score of Chinese apps to the China Clinical Smoking Cessation Guideline

| App number    | Android         | iPhone number | iPhone          |
|---------------|-----------------|---------------|-----------------|
|               | Adherence Score |               | Adherence Score |
| a01           | 10.0            | i01           | 24.5            |
| a02           | 3.0             | i02           | 2.5             |
| a03           | 7.0             | i03           | 15.5            |
| a04           | 12.0            | i04           | 14.0            |
| a05           | 12.0            | i05           | 16.0            |
| a06           | 7.0             | i06           | 6.0             |
| a07           | 10.0            | i07           | 38.0            |
| a08           | 9.0             | i08           | 4.0             |
| a09           | 11.0            | i09           | 20.0            |
| a10           | 12.0            | i10           | 7.0             |
| a11           | 15.0            | i11           | 15.5            |
| a12           | 22.0            | i12           | 18.0            |
| a13           | 4.0             | i13           | 16.5            |
| a14           | 25.0            | i14           | 17.0            |
| a15           | 5.0             | i15           | 13.0            |
| a16           | 19.0            | i16           | 18.5            |
| a17           | 22.0            | i17           | 15.0            |
| a18           | 12.0            | i18           | 15.0            |
| a19           | 3.0             | i19           | 9.5             |
| a20           | 16.0            | i20           | 17.5            |
| a21           | 5.0             | i21           | 9.5             |
| a22           | 11.0            | i22           | 29.5            |
| a23           | 12.0            | i23           | 2.5             |
| a24           | 14.0            | i24           | 6.0             |
| a25           | 16.0            | i25           | 3.0             |
| a26           | 12.0            | i26           | 4.0             |
| a27           | 6.0             | i27           | 36.5            |
| a28           | 15.0            | Average score | 14.6            |
| a29           | 12.0            |               |                 |
| a30           | 10.0            |               |                 |
| a31           | 7.0             |               |                 |
| a32           | 14.0            |               |                 |
| a33           | 11.0            |               |                 |
| a34           | 12.0            |               |                 |
| a35           | 3.0             |               |                 |
| a36           | 10.0            |               |                 |
| a37           | 5.0             |               |                 |
| Average score | 11.1            |               |                 |
